# Supplementary material for: Multicentric Carpo-Tarsal Osteolysis Syndrome Mimicking Juvenile Idiopathic Arthritis: Two Case Reports and Review of the Literature
Source: Frontiers journal article supplement (doi:10.3389/fped.2021.745812), 2021-10-15
Supplement: Presentation_1.pdf [file Presentation_1.pdf]

## Methods

### Patients

This study was undertaken at Children's Hospital of Chongqing Medical University (CQMU). Both patients were admitted to hospital due to joint pain. After excluding infection and cancer, they were suspected of having JIA and were treated accordingly. However, they responded poorly. Therefore, DNA sequencing was carried out. The study was approved by the Ethics Committee of Children's Hospital of CQMU (2020-244-1) and complied with the tenets of the Declaration of Helsinki. Informed consent was obtained from both participants and their legal guardians.

### Literature review

Since Zankl et al. first reported that a mutation in *MAFB* was responsible for MCTO in 2012, we searched for articles published between 2012 and January 2021 using the keywords "Multicentric carpo-tarsal osteolysis syndrome (MCTO)" or "MAF bZIP transcription factor B (MAFB)" in the PubMed, Google Scholar, Medline, Wanfang Med Online, and China National Knowledge Infrastructure (CNKI) databases. Only clear cases with a confirmed genetic diagnosis were reviewed and assessed as part of this study. In addition, references cited in important and significant articles were scanned. All hits from these sources were cross-checked.

### Genetic analysis

DNA obtained from the two children, named patient 1 (P1) and patient 2 (P2), was subjected to whole-exome sequencing and targeted gene sequencing (MyGenostics, Beijing, China), as previously described(1,2). Mutations in the *MAFB* gene were verified by Sanger sequencing (MyGenostics) using the following primer pair targeting exon 1 of the *MAFB* gene: F (5'- GACGCTTGGTGATGATGGTG-3') and R (5'- CTCTTCTCCGCTCTTCCCC-3').

**Supplementary Fig. S1. Pedigree and sequence chromatograms of both patients and their parents.** (A) Patient 1 carries the *de novo* heterozygous mutation c.188 C>A (p. P63Q), and patient 2 (B) has the *de novo* heterozygous mutation c.161 C>T (p. S54L), in the *MAFB* gene. Both mutation loci are highly conserved (C, D).

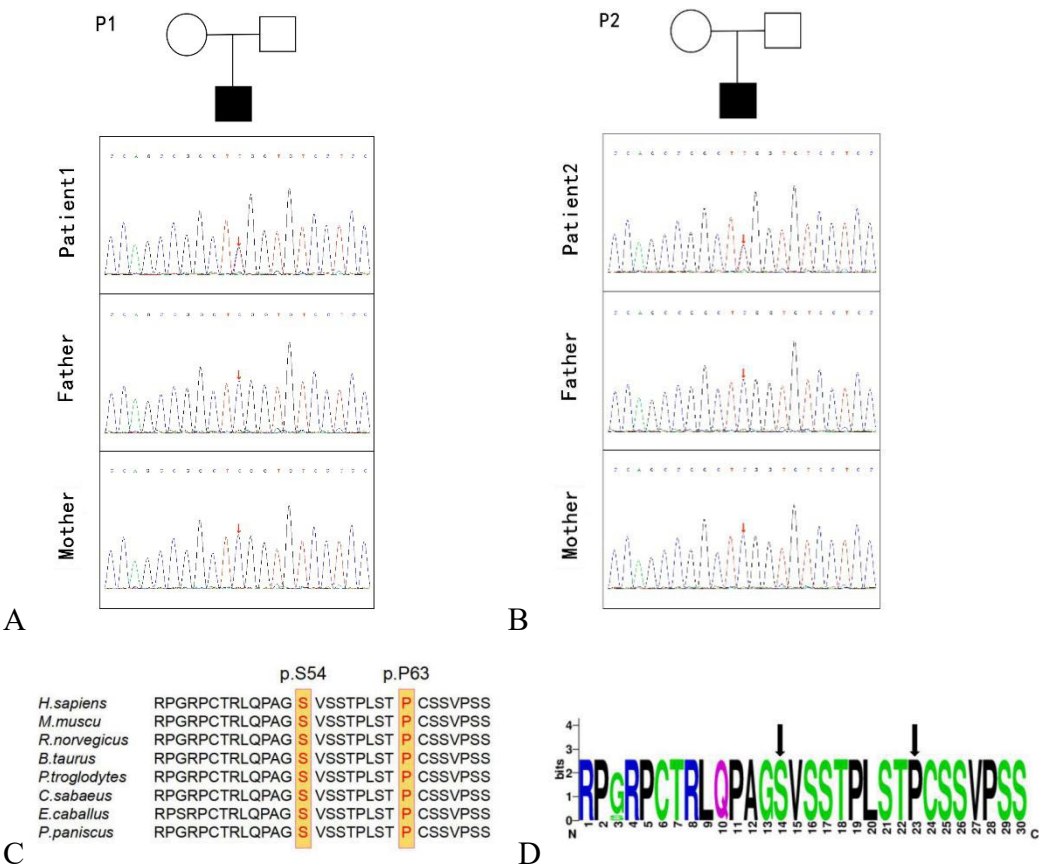

**Supplementary Fig. S2 Mafk domain structure and the location of observed mutations in MCTO patients** Each position indicates the amino acid substitution of the observed mutations in patients where mutations were previously reported for multicentric carpotarsal Osteolysis (MCTO). MCTO is known to be caused by a missense mutation in the transactivation domain. The red one indicates our patients' gene mutations. # (in blue) indicates sporadic cases, @ (in red) indicates familial cases.

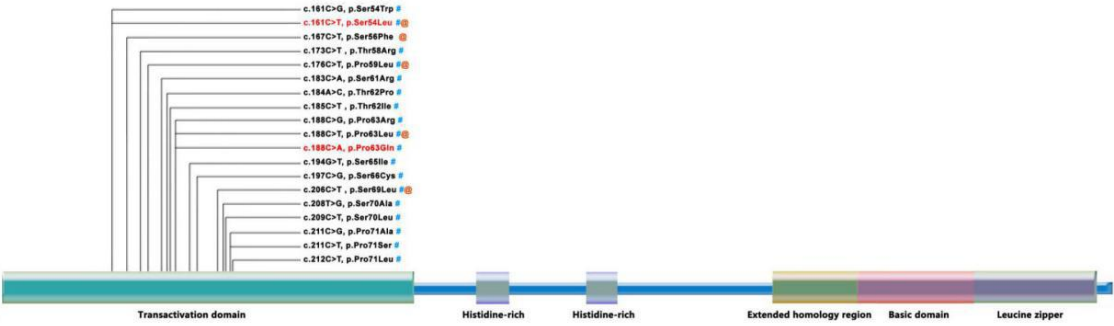

**Supplementary Table S1. Summary of reported *MAFB* mutations in the MCTO patients**

| <i>MAFB</i> mutation |                   | Probands       |                          | Reference                     |
|----------------------|-------------------|----------------|--------------------------|-------------------------------|
| Nucleotide change    | Amino acid change | Sporadic case  | AD familial transmission |                               |
| 161 C>G              | Ser 54 Trp        | 1              |                          | (3)                           |
| 161 C>T              | Ser 54 Leu        | 2              | 7P/2F                    | (4,5), patient 2 in our study |
| 167 C>T              | Ser 56 Phe        |                | 1P/1F <sup>a</sup>       | (6)                           |
| 173 C>T              | Thr 58 Arg        | 1              |                          | (2)                           |
| 176 C>T              | Pro 59 Leu        | 3 <sup>b</sup> | 2P/1F <sup>c</sup>       | (3,4,7,8)                     |
| 183 C>A              | Ser 61 Arg        | 1              |                          | (9)                           |
| 184 A>C              | Thr 62 Pro        | 1              |                          | (4)                           |
| 185 C>T              | Thr 62 Ile        | 1              |                          | (7)                           |
| 188 C>G              | Pro 63 Arg        | 2              |                          | (3,4)                         |
| 188 C>T              | Pro 63 Leu        | 2              | 2P/1F                    | (3,10)                        |
| 188 C>A              | Pro 63 Gln        | 1              |                          | Patient 1 in our study        |
| 194 G>T              | Ser 65 Ile        | 1              |                          | (3)                           |
| 197 C>G              | Ser 66 Cys        | 2              |                          | (4,11)                        |
| 206 C>T              | Ser 69 Leu        | 4              | 4P/2F <sup>d</sup>       | (3,4,12,13)                   |
| 208 T>G              | Ser 70 Ala        | 1              |                          | (4)                           |
| 209 C>T              | Ser 70 Leu        | 3              |                          | (4,7)                         |
| 211 C>G              | Pro 71 Ala        | 1              |                          | (9)                           |
| 211 C>T              | Pro 71 Ser        | 3              |                          | (4,7)                         |
| 212 C>T              | Pro 71 Leu        | 3              |                          | (4,9,14)                      |

a, The same *MAFB* mutation was found in the proband's unaffected mother, sister, and maternal grandmother; b, one of the proband's parents had no sample available for gene testing; c, the mother, who had clinical manifestations of MCTO, did not undergo gene testing; d, two patients were reported by both Mumm et al. (2014) and Regev et al. (2020).

P, patient; F, family.

Supplementary Table S2 Summary of the clinical characteristics of reported MCTO patients with *MAFB* mutations

| Patients | Symptom onset(years)                | Initial diagnosis (years) | Age at MCTO diagnosis (years) | Other Joints (except wrists and ankles) affected | Treatment and effectiveness                                              | Renal findings                                                                                                                                                     | Eye problems                                                             | Facial abnormality                                                                     | Other manifestations                                                                                                                 | Reference |
|----------|-------------------------------------|---------------------------|-------------------------------|--------------------------------------------------|--------------------------------------------------------------------------|--------------------------------------------------------------------------------------------------------------------------------------------------------------------|--------------------------------------------------------------------------|----------------------------------------------------------------------------------------|--------------------------------------------------------------------------------------------------------------------------------------|-----------|
| P1-P11   | NA                                  | NA                        | NA                            | NA                                               | NA                                                                       | Five had undergone renal transplantation, three had markedly impaired renal function but did not yet require dialysis. Three had no evidence of renal dysfunction. | NA                                                                       | NA                                                                                     | NA                                                                                                                                   | (4)       |
| P12-P14  | NA                                  | NA                        | NA                            | NA                                               | NA                                                                       | no evidence of renal dysfunction                                                                                                                                   | NA                                                                       | NA                                                                                     | NA                                                                                                                                   | (4)       |
| P15-P18  | NA                                  | NA                        | NA                            | NA                                               | NA                                                                       | no evidence of renal dysfunction, an exception of one individual who at a very old age developed renal dysfunction                                                 | NA                                                                       | NA                                                                                     | NA                                                                                                                                   | (4)       |
| P19      | R hand pain and swollen wrists(4y); | JIA                       | NA                            | NA                                               | NA                                                                       | NA                                                                                                                                                                 | NA                                                                       | NA                                                                                     | an Arnold-Chiari malformation type I. During late puberty, androgenetic alopecia and slight non-immunological bilateral exophthalmos | (6)       |
| P20      | wrists pain (2y)                    | JIA (2y)                  | 17y                           | elbows, knees, hips,                             | salicylate(2y, no effective); Multiple orthopedic surgeries (childhood); | terminal renal insufficiency (17y), Peritoneal dialysis, and renal transplantation (8m later)                                                                      | band keratitis with bilateral anterior stromal corneal opacities without | hypertelorism, exophthalmia, synophrys, hypoplastic alenate, protruding columella, and | Diaphragmatic hernia and underwent surgery (at birth); recurrent ENT complications (5y); EBV+ B cell                                 | (3)       |

|                     |                                                                    |                       |     |                                                  |                                                                                                        |                                                                                                                                                                                                                                                                                                                         |                  |                |                                                |     |
|---------------------|--------------------------------------------------------------------|-----------------------|-----|--------------------------------------------------|--------------------------------------------------------------------------------------------------------|-------------------------------------------------------------------------------------------------------------------------------------------------------------------------------------------------------------------------------------------------------------------------------------------------------------------------|------------------|----------------|------------------------------------------------|-----|
|                     |                                                                    |                       |     |                                                  |                                                                                                        |                                                                                                                                                                                                                                                                                                                         | corneal thinning | a chin dimple. | lymphoma with (28y)                            |     |
|                     |                                                                    |                       |     |                                                  | orthopedic surgeries (15-16y); thoracic vertebral arthrodesis (18y); etanercept (5y-20y, pain release) | mild proteinuria (11y) and regular follow-up of proteinuria; enalapril (15y) +losartan(16y)                                                                                                                                                                                                                             | NA               | NA             | NA                                             | (3) |
| P21 (son)           | left ankle pain (1y)                                               | NA                    | 11y | elbows, knees, hips, and thoracic scoliosis(18y) |                                                                                                        |                                                                                                                                                                                                                                                                                                                         |                  |                |                                                |     |
| P22 (Father of P21) | NA                                                                 | NA                    | 20y | elbows, knees                                    | NA                                                                                                     | renal insufficiency, renal transplantation (20y)                                                                                                                                                                                                                                                                        | NA               | NA             | NA                                             | (3) |
| P23 (son)           | asymptom, but skeletal radiographs showed carpal osteolysis(5y10m) | NA                    | 6y  | phalanges of thumbs and forefingers              | NA                                                                                                     | HUS, bilateral renal hypoplasia (5y10m), dialysis, renal transplantation (6.5y)                                                                                                                                                                                                                                         | NA               | NA             | several bronchiolitis and asthma in childhood; | (3) |
| P24 (Mom of P23)    | carpal and tarsal osteolysis(2y)                                   | Haidu Cheney syndrome | 2y  | distal forearms                                  | None                                                                                                   | high BP and proteinuria, but normal renal function (during first pregnancy at 29y), and symptoms resolved after delivery, preeclampsia with high BP and severe proteinuria, normal renal function ( during 2 <sup>nd</sup> pregnancy, 35y); acute renal insufficiency and bilateral renal hypoplasia(42y); Dialysis was | NA               | NA             | NA                                             | (3) |

|     |                                                |                                                      |                 |                                   |                                                                                                                      |                                                                                                     |                  |                                                 |                                                                         |     |
|-----|------------------------------------------------|------------------------------------------------------|-----------------|-----------------------------------|----------------------------------------------------------------------------------------------------------------------|-----------------------------------------------------------------------------------------------------|------------------|-------------------------------------------------|-------------------------------------------------------------------------|-----|
|     |                                                |                                                      |                 |                                   |                                                                                                                      | needed, waiting for renal transplantation                                                           |                  |                                                 |                                                                         |     |
| P25 | left ankle arthritis(3y)                       | Septic arthritis (3y); Torg Winchester syndrome (7y) | NA              | left knee (10y), left elbow (11y) | surgical management (3y), casts and NSAIDs (10y); etanercept 12y (no effective, withdraw in 6m), physiotherapy (13y) | no renal impairment                                                                                 | NA               | hypertelorism, high nasal bridge, and synophrys | NA                                                                      | (3) |
| P26 | wrist and foot abnormalities (early childhood) | NA                                                   | early childhood | NA                                | NA                                                                                                                   | terminal renal insufficiency (17y), Peritoneal dialysis was used until kidney transplantation (18y) | NA               | NA                                              | epileptic seizures from age 4 to 12 years, and was treated by valproate | (3) |
| P27 | swollen wrists (6m)                            | NA                                                   | 2y              | right ulnar                       | NA                                                                                                                   | Normal renal function                                                                               | NA               | NA                                              | NA                                                                      | (3) |
| P28 | Birth                                          | JIA 2.5y                                             | 3y              | shoulders, knees, elbows          | NA                                                                                                                   | proteinuria (3 y)                                                                                   | corneal clouding | NA                                              | NA                                                                      | (7) |
| P29 | 6m                                             | JIA                                                  | 1.5y            | elbows                            | NA                                                                                                                   | proteinuria (4 y), renal transplant (11y)                                                           | corneal clouding | NA                                              | NA                                                                      | (7) |
| P30 | 2m                                             |                                                      | 1.5y            | elbows, knees                     | NA                                                                                                                   | proteinuria (21 m), unsuccessful renal transplant (9 y)                                             | none             | NA                                              | NA                                                                      | (7) |
| P31 | 2m                                             | Rickets                                              | 3y              | TMJ, shoulders, knees, elbows     | NA                                                                                                                   | proteinuria (5 y)                                                                                   | none             | NA                                              | NA                                                                      | (7) |
| P32 | 2.5y                                           | JIA                                                  | 14y             | elbows                            | NA                                                                                                                   | proteinuria (7 y),renal transplant (17 y)                                                           | none             | NA                                              | NA                                                                      | (7) |
| P33 | NA                                             | JIA 6y                                               | 11y             | elbows                            | NA                                                                                                                   | proteinuria (14y)                                                                                   | none             | NA                                              | NA                                                                      | (7) |
| P34 | 12m                                            | JIA                                                  | 6.5y            | elbows                            | NA                                                                                                                   | none                                                                                                | corneal clouding | NA                                              | NA                                                                      | (7) |

|                     |                                                       |           |      |                                                        |                                                                                                                                                                                                    |                                                                                                    |      |                                                           |                                                                                                                                                                                                               |        |
|---------------------|-------------------------------------------------------|-----------|------|--------------------------------------------------------|----------------------------------------------------------------------------------------------------------------------------------------------------------------------------------------------------|----------------------------------------------------------------------------------------------------|------|-----------------------------------------------------------|---------------------------------------------------------------------------------------------------------------------------------------------------------------------------------------------------------------|--------|
| P35                 | 20m for symptoms                                      | JIA (5 y) | 5.5y | elbows, knees                                          | Denosumab (less pain and increased daily activities with improved R wrist function, osteolysis stabilized)                                                                                         | none                                                                                               | none | NA                                                        | NA                                                                                                                                                                                                            | (7,13) |
| P36<br>(Mom of P35) | 3y                                                    | JIA       | 38y  | cervical spine, elbows, PIP joints of Hands            | NA                                                                                                                                                                                                 | renal failure, shrunk kidney                                                                       | none | NA                                                        | NA                                                                                                                                                                                                            | (7,13) |
| P37                 | claudication symptoms (26m)                           | JIA       | 15y  | feet and pes cavus.                                    | NSAIDs, MTX(no effective); infliximab (5y, pain decreased and eventually disappeared, progressive osteolysis); tocilizumab (8y, after three months treatment, the pain and tenderness disappeared) | NA                                                                                                 | NA   | micrognathia, hypotelorism, chubby cheeks, and flat face. | NA                                                                                                                                                                                                            | (15)   |
| P38                 | wrists, elbows, and shoulders pain and scoliosis (8y) | JIA       | 16y  | elbows, shoulders, hips, and severe thoracic scoliosis | decompression and spinal fusion(12y), Combined Arthritis Program (CAP,16y), Total Hip Arthroplasty (16y)                                                                                           | bilateral renal cysts, and non-nephrotic range proteinuria (12y)                                   | NA   | mid-face hypoplasia, exophthalmos, micrognathia,          | severe Chiari I malformation with herniation; mild dilatation of the aortic root and a restrictive pattern on pulmonary function tests without parenchymal lung disease; mild central obstructive sleep apnea | (8)    |
| P39                 | R wrist pain (4y)                                     | NA        | 13y  | ulna and radius                                        | intra-articular injections of glucocorticoids, methotrexate(4 y); etanercept (7y)(progressive Bone destruction) ;                                                                                  | Concomitant proteinuria and kidney biopsy (13y), which revealed low-grade focal glomerulosclerosis | NA   | NA                                                        | NA                                                                                                                                                                                                            | (5)    |



|     |                                                             |          |     |                                  |                                                                                          |                                                                                                                                                                                                                                                                                               |                              |                                                                  |                                                                                                           |      |  |  |
|-----|-------------------------------------------------------------|----------|-----|----------------------------------|------------------------------------------------------------------------------------------|-----------------------------------------------------------------------------------------------------------------------------------------------------------------------------------------------------------------------------------------------------------------------------------------------|------------------------------|------------------------------------------------------------------|-----------------------------------------------------------------------------------------------------------|------|--|--|
|     |                                                             |          |     |                                  | denosumab (18y, reduce the inflammation)                                                 |                                                                                                                                                                                                                                                                                               |                              |                                                                  |                                                                                                           |      |  |  |
| P40 | 6m                                                          | NA       | 14y | elbows, all fingers, knees, feet | NA                                                                                       | Ultrasonography showed a small size of both kidneys, end-stage renal disease ((oliguria, anemia, and failure to thrive, 12y); dialysis and medications (erythropoietin, ferrous fumarate, calcitriol, and elemental calcium) asymmetry in the size of the kidneys (2y); significant           | cloudy cornea, exophthalmos, | underdeveloped alar nasi, maxillary hypoplasia, and micrognathia | Echocardiography demonstrated left ventricular hypertrophy; tonic-clonic seizure from hypercalcemia (12y) | (11) |  |  |
| P41 | wrists and ankles (toddler)                                 | NA       |     | elbow, right femoral epiphysis   | NA                                                                                       | kidney hypoplasia of the right kidney, the left kidney was compensatorily hypertrophic, 13y); normal renal function proteinuria(4y), oral steroid and enalapril, and proteinuria maintained; kidney biopsy revealed FSGS, NOS variant; chronic hemodialysis (5y), kidney transplantation (6y) | NA                           | triangular face, eye-bulging, micrognathia                       | olecranon bursitis, marfanoid habitus, cachexia, cutis laxa                                               | (10) |  |  |
| P42 | deformity of the left foot and pain in the right wrist (2y) | JIA (2y) |     | mandible and elbows, knees       | prednisolone, methotrexate, and ibuprofen (no effective); alendronate (9y, no effective) |                                                                                                                                                                                                                                                                                               | NA                           | Not mention                                                      | cleft palate, did corrective surgery (3y)                                                                 | (9)  |  |  |

|                     |                                                                     |                                    |      |                                                                |                                                                                                              |                                                                                                                                                                                                                                                                                       |      |                                                                                                                       |                                                                   |      |
|---------------------|---------------------------------------------------------------------|------------------------------------|------|----------------------------------------------------------------|--------------------------------------------------------------------------------------------------------------|---------------------------------------------------------------------------------------------------------------------------------------------------------------------------------------------------------------------------------------------------------------------------------------|------|-----------------------------------------------------------------------------------------------------------------------|-------------------------------------------------------------------|------|
| P43                 | deformity of the right thumb (12y)                                  | JIA (12y)                          | 14y  | multiple PIP joints                                            | correctional surgery, ibuprofen (14y, No effective)                                                          | isolated 2+ proteinuria (12y), A kidney biopsy revealed FSGS, NOS variant (14y); enalapril. A kidney ultrasonogram revealed diffusely increased renal parenchymal echogenicity, proteinuria (14m); normal renal function with spontaneous remission of proteinuria (22m), normal (4y) | NA   | Not mention                                                                                                           | not mention                                                       | (9)  |
| P44                 | tenderness hands and feet (3m)                                      | NA                                 |      | elbow, and knees                                               | NA                                                                                                           |                                                                                                                                                                                                                                                                                       | NA   | NA                                                                                                                    | an abdominal aortic aneurysm (14m)                                | (9)  |
| P45                 | wrists pain and the bottom of his right foot with morning stiffness | ANA+ pJIA (6y)                     | 7.5y | feet, right temporomandibular joint, and PIP joints of fingers | 5y: MTX, etanercept, infliximab, abatacept, and tocilizumab, pamidronate (progressive arthritis); adalimumab | None                                                                                                                                                                                                                                                                                  | None | prominent forehead, maxillary hypoplasia, and bilateral palpebral ptosis, as well as a long philtrum and bulbous nose | speech and walking delay, Learning disability, Hearing impairment | (12) |
| P46<br>(Mom of P45) | wrists and elbows pain (5y)                                         | erosive arthritis (late childhood) | 33y  | elbows, feet                                                   | NA                                                                                                           | NA                                                                                                                                                                                                                                                                                    | NA   | wide-set eyes, triangular face, small and thick ears, hypoplastic nares, a bulbous tip of the nose, and micrognathia  | Learning disability                                               | (12) |
| P47                 | NA                                                                  | NA                                 | 7y   | hands, elbows, and scoliosis                                   | surgical treatment for scoliosis.                                                                            | Diagnosed with FSGS due to proteinuria (3y) proteinuria, no renal                                                                                                                                                                                                                     | NA   | a small forehead and hypotelorism;                                                                                    | NA                                                                | (16) |

|     |                                                           |              |       |                                          |                                                                                                                                                                                                                                           |                                                                                                                                      |      |                                                                     |                    |                        |                                                                                                                                                                                                                   |  |
|-----|-----------------------------------------------------------|--------------|-------|------------------------------------------|-------------------------------------------------------------------------------------------------------------------------------------------------------------------------------------------------------------------------------------------|--------------------------------------------------------------------------------------------------------------------------------------|------|---------------------------------------------------------------------|--------------------|------------------------|-------------------------------------------------------------------------------------------------------------------------------------------------------------------------------------------------------------------|--|
|     |                                                           |              |       |                                          |                                                                                                                                                                                                                                           | dysfunction or hypertension                                                                                                          |      |                                                                     |                    |                        |                                                                                                                                                                                                                   |  |
| P48 | multiple bone deformities and an inability to walk (1.5y) | NA           | 10y   |                                          | Bone biopsy (5y);                                                                                                                                                                                                                         | 1+ proteinuria without hematuria (5y); deteriorated renal function (10y); Shrunk kidney, hemodialysis (10y), kidney transplant (11y) | None | triangular face, micrognathia, and exophthalmos                     | None               | (2)                    |                                                                                                                                                                                                                   |  |
| P49 | Elbow and knee flexion (6m)                               | None         | 1.9y  | Elbows, knees, and feet                  | Alfacalcidol                                                                                                                                                                                                                              | None                                                                                                                                 | None | None                                                                | Mental Retardation | (14)                   |                                                                                                                                                                                                                   |  |
| P50 | Right Wrist pain (2y)                                     | JIA (2y)     | 12.7y | Elbows                                   | NSAIDs, DMARDs (LEF, MTX), and Pavlin (2-7y , joint pain and swelling were relieved and disappeared); naproxen, diclofenac sodium, NSAIDs, MTX, SSZ, etanercept, infliximab (11-13y, not practical); Denosumab (13y, joint pain released) | proteinuria                                                                                                                          | None | subtle facial abnormalities of protruding forehead and micrognathia | None               | Patient1 in our study  | P: patient; JIA: Juvenile idiopathic arthritis; MCTO: Multicentric carpo-tarsal osteolysis syndrome; NA: not available; R: right; LEF : leflunomide; MTX: Methotrexate; SSZ: Sulfasalazine; FSGS: Focal Segmental |  |
| P51 | Wrists pain (11y9m)                                       | JIA (11y10m) | 12.1y | multiple proximal interphalangeal joints | naproxen , MTX, calcium, adalimumab, not effective                                                                                                                                                                                        | None                                                                                                                                 | None | None                                                                | None               | Patient 2 in our study |                                                                                                                                                                                                                   |  |

Glomerular Sclerosis; NOS: not otherwise specified; TNF α: Tumor Necrosis Factor α; NSAIDs: nonsteroidal anti-inflammatory drugs; DMARDs: disease modifying antirheumatic drugs; CAP: Combined Arthritis Program; PIP: proximal interphalangeal

## References

1. Jiang J, Tang W, An Y, Tang M, Wu J, Qin T, Zhao X. Molecular and immunological characterization of DNA ligase IV deficiency. *Clin Immunol* (2016) **163**:75–83. doi:10.1016/j.clim.2015.12.016
2. Li J, Shi L, Lau K, Ma Y, Jia S, Gao X. Identification of a novel mutation in the MAFB gene in a pediatric patient with multicentric carpotarsal osteolysis syndrome using next-generation sequencing. *Eur J Med Genet* (2020) **63**:103902. doi:10.1016/j.ejmg.2020.103902
3. Mehawej C, Courcet JB, Baujat G, Mouy R, Gérard M, Landru I, Gosselin M, Koehrer P, Mousson C, Breton S, et al. The identification of MAFB mutations in eight patients with multicentric carpo-tarsal osteolysis supports genetic homogeneity but clinical variability. *Am J Med Genet Part A* (2013) **161**:3023–3029. doi:10.1002/ajmg.a.36151
4. Zankl A, Duncan EL, Leo PJ, Clark GR, Glazov EA, Addor MC, Herlin T, Kim CA, Leheup BP, McGill J, et al. Multicentric carpotarsal osteolysis is caused by mutations clustering in the amino-terminal transcriptional activation domain of MAFB. *Am J Hum Genet* (2012) **90**:494–501. doi:10.1016/j.ajhg.2012.01.003
5. Zhuang L, Adler S, Aeberli D, Villiger PM, Trueb B. Identification of a MAFB mutation in a patient with multicentric carpotarsal osteolysis. *Swiss Med Wkly* (2017) **147**:w14529. doi:10.4414/smw.2017.14529
6. Dworschak GC, Draaken M, Hilger A, Born M, Reutter H, Ludwig M. An incompletely penetrant novel MAFB (p.Ser56Phe) variant in autosomal dominant multicentric carpotarsal osteolysis syndrome. *Int J Mol Med* (2013) **32**:174–178. doi:10.3892/ijmm.2013.1373
7. Mumm S, Huskey M, Duan S, Wenkert D, Madson KL, Gottesman GS, Nenninger AR, Laxer RM, McAlister WH, Whyte MP. Multicentric carpotarsal osteolysis syndrome is caused by only a few domain-specific mutations in MAFB, a negative regulator of RANKL-induced osteoclastogenesis. *Am J Med Genet Part A* (2014) **164**:2287–2293. doi:10.1002/ajmg.a.36641
8. Sun K, Barlow B, Malik F, Inglis A, Figgie M, Goodman S. Total Hip Arthroplasty in a Patient with Multicentric Carpotarsal Osteolysis: a Case Report. *HSS J* (2016) **12**:177–181. doi:10.1007/s11420-015-9478-0
9. Park PG, Kim KH, Hyun HS, Lee CH, Park JS, Kie JH, Choi YH, Moon KC, Cheong H Il. Three cases of multicentric carpotarsal osteolysis syndrome: A case series. *BMC Med Genet* (2018) **19**:1–7. doi:10.1186/s12881-018-0682-x
10. Stajkovska A, Mehandeziska S, Stavrevska M, Jakovleva K, Nikchevska N, Mitrev Z, Kungulovski I, Zafiroski G, Tasic V, Kungulovski G. Trio clinical exome sequencing in a patient with multicentric carpotarsal osteolysis syndrome: First case report in the Balkans. *Front Genet* (2018) **9**:1–6. doi:10.3389/fgene.2018.00113
11. Choochuen P, Rojneuangnit K, Khetkham T, Khositseth S. The First Report of Multicentric Carpotarsal Osteolysis Syndrome Caused by MAFB Mutation in Asian. *Case Rep Med* (2018) **2018**: doi:10.1155/2018/6783957
12. Upadia J, Gomes A, Weiser P, Descartes M. A Familial Case of Multicentric Carpotarsal Osteolysis Syndrome and Treatment Outcome. *J Pediatr Genet* (2018) **07**:174–179. doi:10.1055/s-0038-1657760
13. Regev R, Laxer R, Whitney-Mahoney K, Elia Y, Noone D, Shammass A, Reza V, Sochett EB. MON-LB72 Multicentric Carpotarsal Osteolysis Syndrome (MCTO) Has a Generalized High Turnover Bone Phenotype, High S RANKL and Responds to Denosumab. *J Endocr Soc* (2020) **4**:771–772. doi:10.1210/jendso/bvaa046.2142
14. Zhi-kuan G, , ZHAI Hong-yin, ZHANG Yong TP. Multicentric carpotarsal osteolysis syndrome: a case report GUO. *CHIN J Osteoporos BONE Min RES Vol* (2019) **12**:8–12. doi:10.3969/j.issn.1674-2591.2019.06.008
15. Nishikomori R, Kawai T, Toshiyuki K, Oda H, Yasumi T, Izawa K, Ohara O, Heike T. Remarkable improvement of articular pain by biologics in a Multicentric carpotarsal osteolysis patient with a mutation of MAFB gene. *Pediatr Rheumatol* (2015) **13**:P152. doi:10.1186/1546-0096-13-s1-p152
16. Miyazaki K, Komatsubara S, Uno K, Fujihara R, Yamamoto T. A CARE-compliant article: A case report of scoliosis complicated with multicentric carpotarsal osteolysis. *Medicine (Baltimore)* (2019) **98**:e17828. doi:10.1097/MD.00000000000017828
